# Supplementary material
Source: MDPI journal article supplement (https://www.mdpi.com/1999-4907/14/3/486)
Supplement: s1 [file s1]

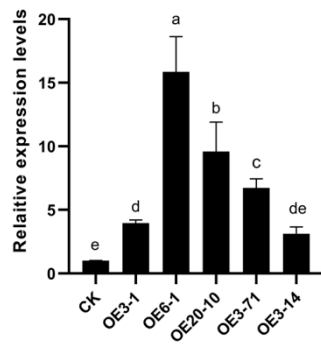

Figure S1 Expression analysis of *CbWRKY27* in wild-type and transgenic lines (OE3-1, OE6-1, OE20-10, OE3-71, OE3-14). qRT-PCR data were normalized to the internal control expression of *CbActin*. The data represent the means  $\pm$  SD ( $n=3$ ). Significance analysis was performed using a one-way analysis of variance ANOVA, and different lowercase letters indicate  $P < 0.05$ .

200 mM NaCl

WT

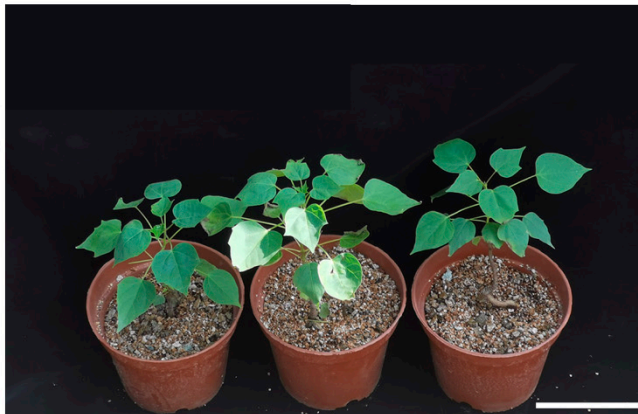

OE6-1

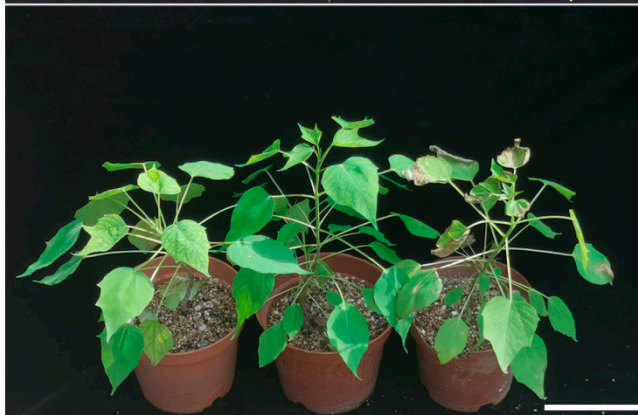

OE20-10

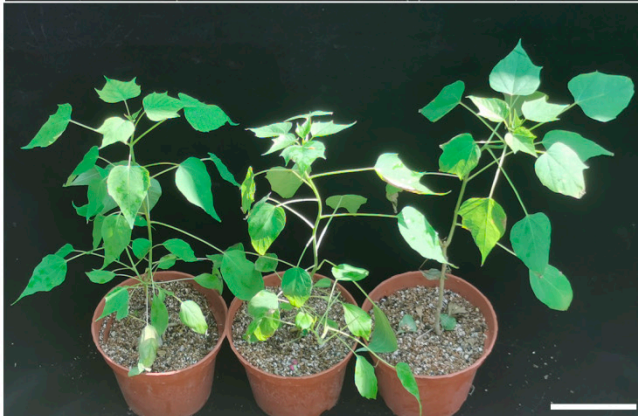

OE3-71

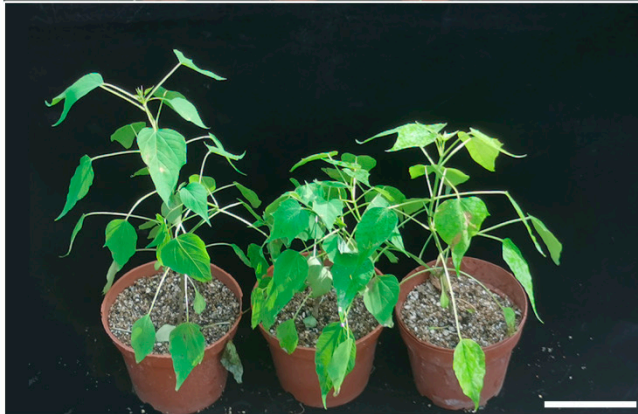

Figure S2 Phenotypic map of 18-week-old wild-type and transgenic plants after treatment with 200 mM NaCl for two days. Bar=10 cm.

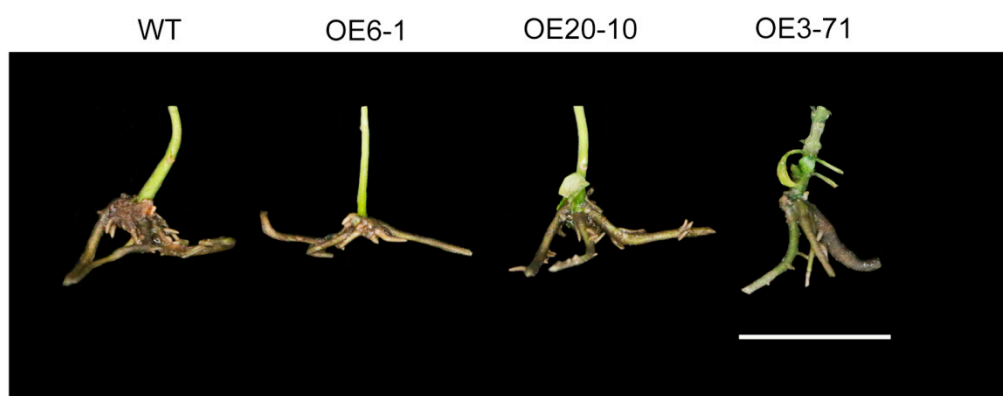

Figure S3 Root growth of six-week-old wild-type and transgenic seedlings before ABA treatment. Bar=2 cm.

**Supplementary Table S1:** Primer sequences

| Primer name     | Homologous<br><i>Arabidopsis</i> | Sequence (5'- 3')                               | Note   |
|-----------------|----------------------------------|-------------------------------------------------|--------|
| CbNN1-eGFP-F    |                                  | GGGGTACCATGGACGACGATTGGGATCT                    | Kpn I  |
| CbNN1-eGFP-R    |                                  | CGGGATCCACCACCGCCGGCGATGGTG<br>G                | BamH I |
| CbNN1-BD-F      |                                  | CATGGAGGCCGAATTCATGGACGACGA<br>TTGGGATCT        | EcoR I |
| CbNN1-BD-R      |                                  | TAGTTATGCGGCCGCTGCAGTTAACCAC<br>CGCCGGCGATGGTGG | Pst I  |
| CbNN1(N)-BD-F   |                                  | CATGGAGGCCGAATTCATGGACGACGA<br>TTGGGATCT        | EcoR I |
| CbNN1(N)-BD-R   |                                  | TAGTTATGCGGCCGCTGCAGAGAAGTTA<br>AATTCTCAGCAGG   | Pst I  |
| CbNN1(N+W)-BD-F |                                  | CATGGAGGCCGAATTCATGGACGACGA<br>TTGGGATCT        | EcoR I |
| CbNN1(N+W)-BD-R |                                  | TAGTTATGCGGCCGCTGCAGGTGGTTGT<br>GCTCCCCCGTGTA   | Pst I  |
| CbNN1(W+C)-BD-F |                                  | CATGGAGGCCGAATTCGATATGTGGTCA<br>TGGAGAA         | EcoR I |
| CbNN1(W+C)-BD-R |                                  | TAGTTATGCGGCCGCTGCAGTTAACCAC<br>CGCCGGCGATGGTGG | Pst I  |
| CbNN1(C)-BD-F   |                                  | CATGGAGGCCGAATTCATGCCTACT<br>CACCGGAA           | EcoR I |
| CbNN1(C)-BD-R   |                                  | TAGTTATGCGGCCGCTGCAGTTAACCAC<br>CGCCGGCGATGGTGG | Pst I  |

|                                 |       |                                                                                                      |        |
|---------------------------------|-------|------------------------------------------------------------------------------------------------------|--------|
| CbNN1-AD-F                      |       | TGCCTCTCCC <b>GAATTC</b> ATGGACGACGATT<br>GGGATCT                                                    | EcoR I |
| CbNN1-AD-R                      |       | CGAGTCGGCC <b>GAATTC</b> TTAACCACCGCC<br>GGCGATGGTGG                                                 | EcoR I |
| W-box-LacZ-F                    |       | ATCTGTCGAC <b>CTCGAG</b> TTGACTTTGACTT<br>TGACT                                                      | Xho I  |
| W-box-LacZ-R                    |       | GAGCACATGC <b>CTCGAG</b> AGTCAAAGTCAA<br>AGTCAA                                                      | Xho I  |
| mW-box1-LacZ-F                  |       | ATCTGTCGAC <b>CTCGAG</b> TTGA <sub>t</sub> TTTGA <sub>t</sub> TTT<br>GA <sub>t</sub> T               | Xho I  |
| mW-box1-LacZ-R                  |       | GAGCACATGC <b>CTCGAG</b> A <sub>a</sub> TCAA <sub>a</sub> A <sub>a</sub> TCAA<br>A <sub>a</sub> TCAA | Xho I  |
| mW-box2-LacZ-F                  |       | ATCTGTCGAC <b>CTCGAG</b> T <sub>c</sub> GACTT <sub>c</sub> GACTT <sub>c</sub><br>GACT                | Xho I  |
| mW-box2-LacZ-R                  |       | GAGCACATGC <b>CTCGAG</b> AGTC <sub>g</sub> AAGTC <sub>g</sub> A<br>AGTC <sub>g</sub> A               | Xho I  |
| mW-box3-LacZ-F                  |       | ATCTGTCGAC <b>CTCGAG</b> TTaACTTTaAC<br>TTTaACT                                                      | Xho I  |
| mW-box3-LacZ-R                  |       | GAGCACATGC <b>CTCGAG</b> AGT <sub>t</sub> AAAGT <sub>t</sub><br>AAAGT <sub>t</sub> AA                | Xho I  |
| mW-box4-LacZ-F                  |       | ATCTGTCGAC <b>CTCGAG</b> TTG <sub>g</sub> CTTTG <sub>g</sub> C<br>TTTG <sub>g</sub> CT               | Xho I  |
| mW-box4-LacZ-R                  |       | GAGCACATGC <b>CTCGAG</b> AG <sub>c</sub> CAAAG <sub>c</sub> C<br>AAAG <sub>c</sub> CAA               | Xho I  |
| pCAMBIA2300- <i>CbNNI</i><br>-F |       | ACGC <b>GTCGAC</b> ATGGACGACGATTGG<br>GATCT                                                          | Sal I  |
| pCAMBIA2300- <i>CbNNI</i><br>-R |       | GCT <b>CTAG</b> ATTAACCACCGCCGGCGAT<br>GG                                                            | Xba I  |
| 1305- <i>CbNNI</i> -F           |       | AAGTCCGGAGCTAGCT <b>TCTAGA</b> ATGG<br>ACGACGATTGGGATCT                                              | Xba I  |
| 1305- <i>CbNNI</i> -R           |       | GCCCTTGCTCACCAT <b>GGATCC</b> ACCAC<br>CGCCGGCGATGGTGG                                               | BamH I |
| <i>GUS</i> -F                   |       | TGAATCCGCACCTCTGG                                                                                    |        |
| <i>GUS</i> -R                   |       | TTCATTGTTTGCCTCCCT                                                                                   |        |
| <i>CbNNI</i> -qRT-F             |       | CGACCCGGGAATGTTTATCG                                                                                 |        |
| <i>CbNNI</i> -qRT-R             |       | GGCGAGCGAGATGATTTGTT                                                                                 |        |
| <i>Actin</i> -qRT-F             |       | GATGATGCTCCAAGAGCTGT                                                                                 |        |
| <i>Actin</i> -qRT-R             |       | TCCATATCATCCCAGTTGCT                                                                                 |        |
| NCED3-F                         | NCED3 | CAACAATGACGCACGATT                                                                                   |        |
| NCED3-R                         | NCED3 | GACATCTTGAACACCACTTG                                                                                 |        |
| ABI3-F                          | ABI3  | CGTATGGCTTGACAGAGA                                                                                   |        |
| ABI3-R                          | ABI3  | AGGAGGAAGAAGAAGATGAC                                                                                 |        |
| ABI5-F                          | ABI5  | CAGAGTGGTGTAGGAGAG                                                                                   |        |
| ABI5-R                          | ABI5  | CGATGGTGGTTGTGAGTA                                                                                   |        |

|         |       |                         |
|---------|-------|-------------------------|
| RD22-F  | RD22  | AACTCAACTGCATGACAACCCC  |
| RD22-R  | RD22  | TTGCCGAAAACCTTATCCAAAAT |
| RD29B-F | RD29B | TGAAGGATAAGGCGAAGAA     |
| RD29B-R | RD29B | TTGATTGTAGGAGCACCAT     |
| APX-F   | APX   | AAGGATTCCATGATCTCCCC    |
| APX-R   | APX   | TGTGCTTTTCCCAATGTGTG    |
| SOD-F   | SOD   | AGCAGCAGCGAGGGTGTT      |
| SOD-R   | SOD   | CGGGATTGAAGTGGGGTC      |

**Supplementary Table S2:** Overexpression of *CbWRKY27* enhances ABA sensitivity in transgenic plants.

|                          | ABA (0 $\mu$ M)  |                   |                   |                   | ABA (25 $\mu$ M) |                   |                   |                   |
|--------------------------|------------------|-------------------|-------------------|-------------------|------------------|-------------------|-------------------|-------------------|
|                          | WT               | OE6-1             | OE20-10           | OE3-71            | WT               | OE6-1             | OE20-10           | OE3-71            |
| lateral roots length(cm) | 2.57 $\pm$ 0.49  | 2.76 $\pm$ 0.68   | 2.36 $\pm$ 0.45   | 2.68 $\pm$ 0.67   | 1.18 $\pm$ 0.19  | 0.97 $\pm$ 0.26*  | 0.82 $\pm$ 0.23** | 0.89 $\pm$ 0.27** |
| Number of lateral roots  | 20.33 $\pm$ 3.79 | 14.33 $\pm$ 1.53* | 14.33 $\pm$ 2.52* | 14.33 $\pm$ 2.31* | 26.67 $\pm$ 3.51 | 20.00 $\pm$ 3.00* | 20.33 $\pm$ 2.52* | 20.00 $\pm$ 1.73* |

**Note:** Length of lateral roots and Number of lateral roots before and after ABA treatment. The data represent the means  $\pm$  SD ( $n=3$ ), \* $p < 0.05$  and \*\* $P < 0.01$  using the Student's  $t$ -test.
